# Supplementary material for: Biochemical Responses to the Long-Term Impact of Copper Sulfate (CuSO4) in Tobacco Plants
Source: MDPI journal article supplement (doi:10.3390/ijms242015129), 2023-10-13
Supplement: s1 [file s1]

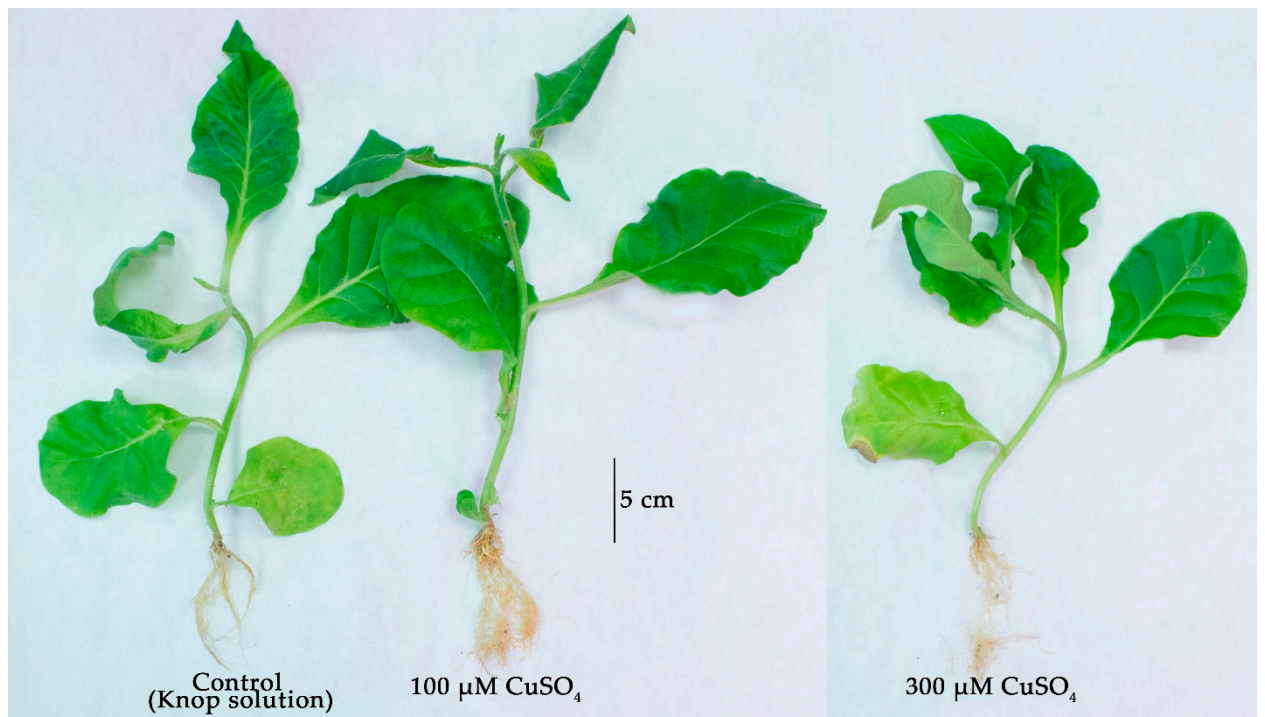

**Figure S1.** Tobacco plants after the long-term substrate treatment with 100 and 300  $\mu\text{M}$   $\text{CuSO}_4$ . Bar 5 cm.
